# Supplementary material for: Identification of novel genetic variants predisposing to familial oral squamous cell carcinomas
Source: PubMed Central journal article supplement (PMC6877579; doi:10.1038/s41421-019-0126-6), 2019-11-26
Supplement: 41421_2019_126_MOESM1_ESM.pdf [file 41421_2019_126_MOESM1_ESM.pdf]

## Supplementary Information

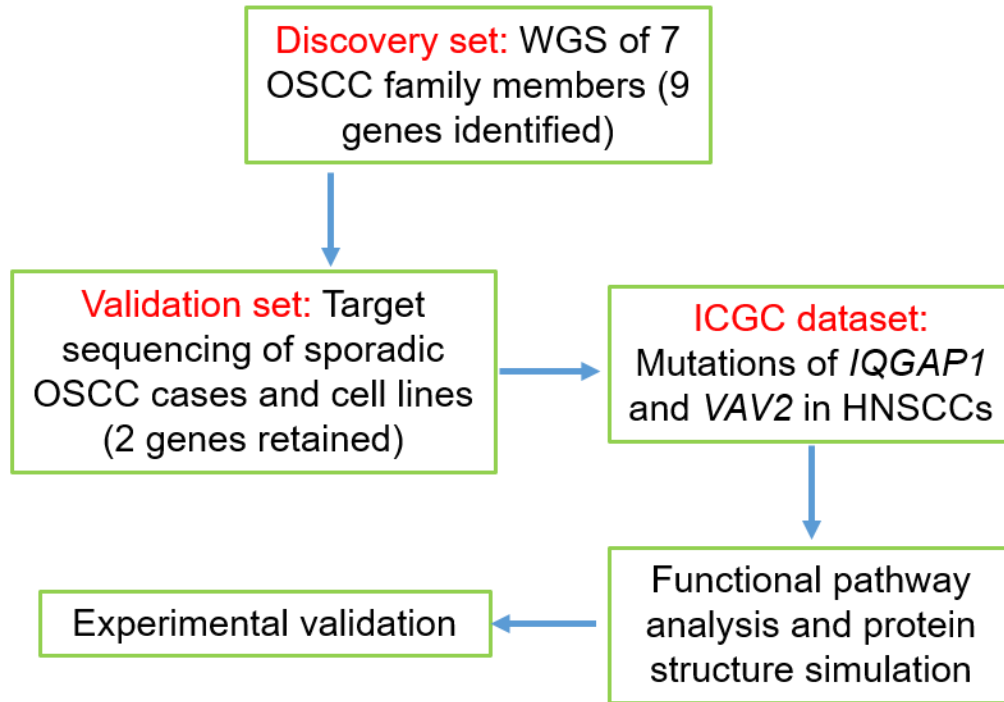

**Supplementary Fig. S1.** The flow chart of the whole study.

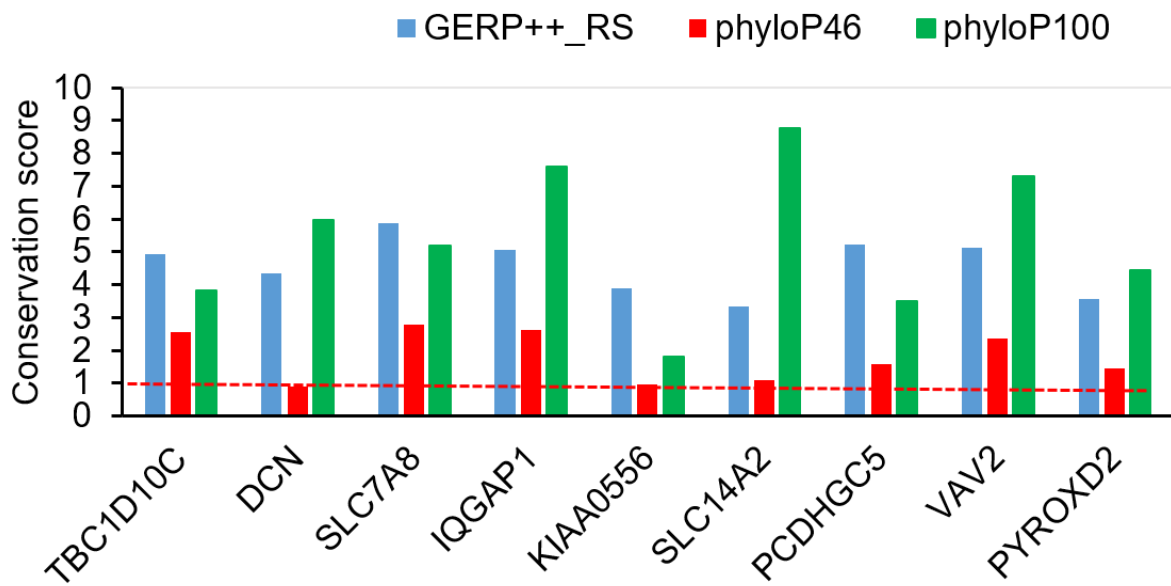

**Supplementary Fig. S2.** Sequence conservation analysis of the identified variants. The conservation scores predicted by three independent datasets (GERP++\_RS, blue; phyloP46, orange; phyloP100, grey) are shown (Y axis) for each of the identified genes (X axis). All scores are greater than one, indicating that all the variants are relatively conserved across species.

PROTEOGLYCANS IN CANCER

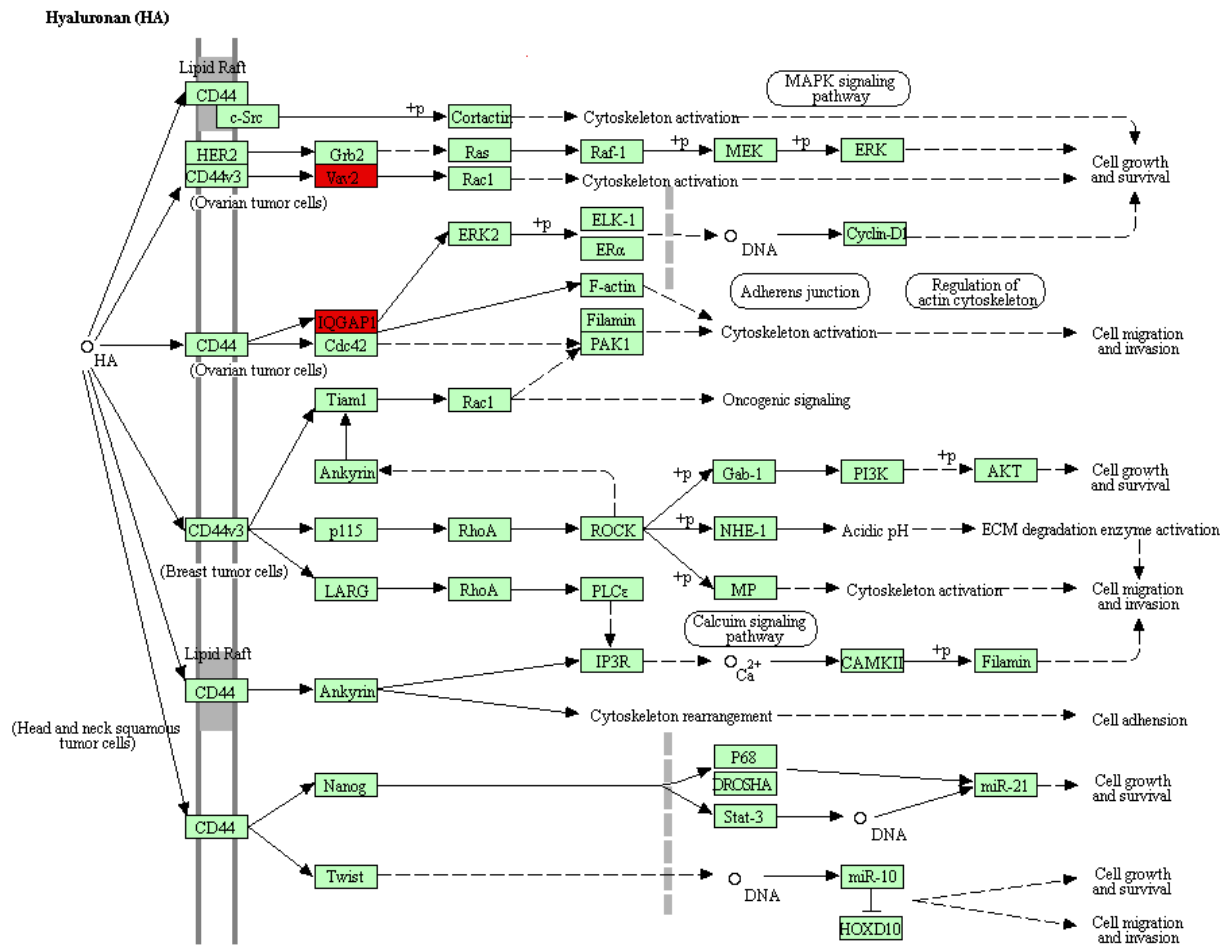

**Supplementary Fig. S3.** Picture of part of the KEGG pathway “Proteoglycans in cancer” (hsa05205). VAV2 and IQGAP1 are highlighted in red.

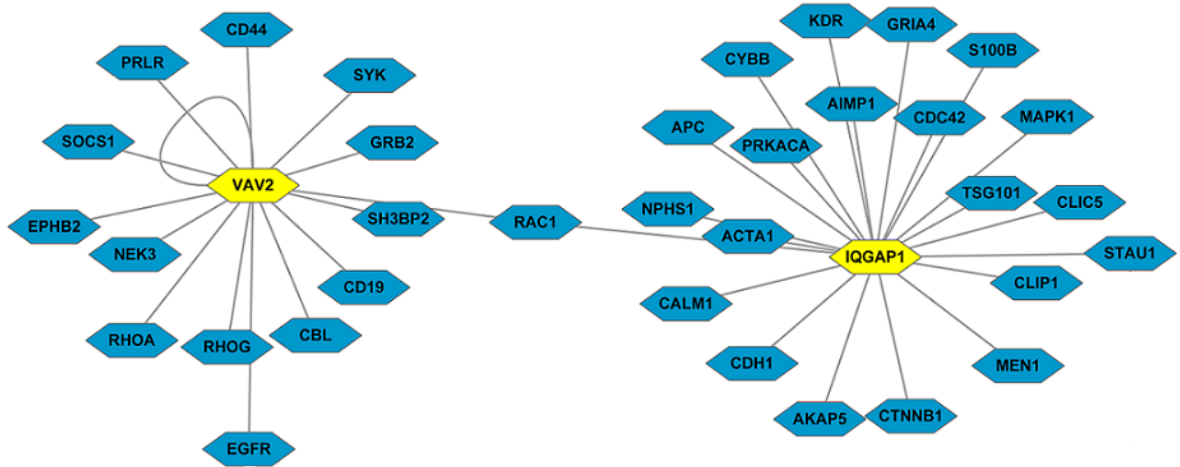

**Supplementary Fig. S4.** Protein-protein interaction network of the proteins encoded by the candidate genes. In the network, the identified genes (yellow node) are in the center, and the interacting ones (blue node) are outside. Each edge links one yellow node and one blue node, which indicates an interaction between the two proteins.

**a**

```
      820      830      840      850      860      870
|...|...|...|...|...|...|...|...|...|...|...|...|...|...|...
Homo    TAVARYNFAARDMRELSLREGDVVRIYSRIGGDQGWWKGETNGRIGWFPSTYVEEEGIQ
Mus     TAVARYNFAARDMRELSLREGDVVVKIYSRIGGDQGWWKGETNGRIGWFPSTYVEEEGVQ
Gallus  TAVARYNFAARDMRELSLREGDVVVKIYSRIGGDQGWWKGETNGRIGWFPSTYVEEEGVQ
Anolis  TAVARYNFAARDMRELSLREGDVVVKIYSRIGGDQGWWKGETNGRIGWFPSTYVEEEGVQ
Xenopus TAIARYNFAARDMRELSLREGDVVRIYSRIGGDQGWWKGETNGRIGWFPSTYVEEEGVQ
Danio   TAVARYNFAARDMRELSLREGDIVKIIYSKIGGDQGWWKGEANGRIGWFPSTYVDEEGVQ
Clustal Consensus **:*****:***:*****:***:*****:***:*
```

**b**

```
      460      470      480      490      500      510
..|...|...|...|...|...|...|...|...|...|...|...|...|...|...
Homo    AVEMLSSVALINRALESQDVNTVWKQLSSSVTGLTNIEEENCQRYLDELMKLLKQAHAEN
Mus     AVEMLSSVALINRALESQDMTTVWKQLSSSVTGLTNIEEENCQRYLDELMKLLKQAHAEN
Gallus  AVEMLSSVAVINRALDSQDVSTVWKQLSNPVTGLTNVEDENSQRYIDDLMLKLLKQMHAE
Anolis  AVEMLSSVALINRALDAGDVMIIWKQLSSPVTGLTNVEDENLQRYIEELMRLKAEQAEG
Xenopus AVEMLSSVALINRALDAGDVSTMKKQLISPVTGLMDVDDENLQRYIDELIRMKQQAAREG
Danio   AVEMLSSVVLINRALDVGDRAAIWKQLSSSVTGLSNVEDEYSQRYIDELLRLKATAREEG
Clustal Consensus *****.:**.*: ** : *** ..**** :::* ****:::***: * : *
```

**Supplementary Fig. S5.** Clustal omega multi-sequence alignments of VAV2 and IQGAP1 amino acid sequences across species. **(a)** Multi-sequence alignments of VAV2 amino acid sequences across vertebrates. The mutated amino acid Val872 is indicated by the yellow box. **(b)** Multi-sequence alignments of IQGAP1 amino acid sequences across vertebrates. The mutated amino acid Ser459 is highlighted by the yellow box.

**Supplementary Table S1. The detail information of the family members**

| Sample ID | Sample name | Sex | Age | Oral cancer | Mortality | Tobacco or alcohol user | Other notes                        |
|-----------|-------------|-----|-----|-------------|-----------|-------------------------|------------------------------------|
| 1         | SF-001M     | F   | -   | Yes         | died      | No                      | Type I diabetes                    |
| 2         | -           | M   | -   | Yes         | died      | No                      | -                                  |
| 3         | SF-002G     | F   | -   | Yes         | died      | No                      | -                                  |
| 4         | SF-002P     | M   | 61  | Yes         | alive     | No                      | Type I diabetes since 44 years old |
| 5         | SF-003S     | F   | 27  | No          | alive     | No                      | Type I diabetes since 9 years old  |
| 6         | SF-003J     | M   | 31  | No          | alive     | No                      | -                                  |
| 7         | SF-003C     | M   | 31  | No          | alive     | No                      | -                                  |
| 8         | -           | M   | -   | No          | died      | -                       | -                                  |
| 9         | SF-002S     | F   | -   | No          | alive     | No                      | -                                  |

**Supplementary Table S2. Statistics for whole genome sequencing coverage and depth**

| <b>Sample</b>    | <b>SF-002G</b> | <b>SF-001M</b> | <b>SF-003C</b> | <b>SF-002P</b> | <b>SF-003S</b> | <b>SF-003J</b> | <b>SF-002S</b> |
|------------------|----------------|----------------|----------------|----------------|----------------|----------------|----------------|
| GC content rate  | 39.47%         | 38.51%         | 41.10%         | 41.76%         | 41.01%         | 41.50%         | 40.31%         |
| mismatch rate    | 0.53%          | 0.68%          | 0.49%          | 0.48%          | 0.56%          | 0.50%          | 0.35%          |
| reads length(bp) | 90             | 90             | 90             | 90             | 90             | 90             | 90             |
| Coverage rate    | 99.91%         | 99.91%         | 99.92%         | 99.93%         | 99.93%         | 99.93%         | 99.92%         |
| Coverage >= 4X   | 99.64%         | 99.41%         | 99.84%         | 99.84%         | 99.79%         | 99.84%         | 99.90%         |
| Coverage >= 8X   | 99.07%         | 97.53%         | 99.66%         | 99.64%         | 99.60%         | 99.66%         | 99.69%         |
| Coverage >= 10X  | 98.56%         | 95.60%         | 99.48%         | 99.41%         | 99.45%         | 99.47%         | 99.40%         |
| Coverage >= 20X  | 91.19%         | 73.18%         | 95.80%         | 94.82%         | 97.12%         | 95.50%         | 96.00%         |
| Mean Depth       | 37.11          | 27.12          | 41.80          | 40.54          | 40.83          | 40.74          | 41.84          |
| Coverage of chrX | 99.92%         | 99.93%         | 99.89%         | 99.91%         | 99.94%         | 99.90%         | 99.88%         |
| Coverage of chrY | 18.00%         | 17.92%         | 99.17%         | 99.18%         | 17.45%         | 99.17%         | 14.94%         |
| Duplication rate | 3.31%          | 3.58%          | 1.79%          | 1.93%          | 1.67%          | 1.89%          | 5.62%          |

**Supplementary Table S3. Statistics for all SNVs identified in each sample**

| Sample              | SF-002G   | SF-001M   | SF-003C   | SF-002P   | SF-003S   | SF-003J   | SF-002S   |
|---------------------|-----------|-----------|-----------|-----------|-----------|-----------|-----------|
| downstream          | 22,273    | 21,014    | 23,028    | 22,964    | 22,901    | 23,039    | 23,688    |
| exonic              | 426       | 375       | 445       | 456       | 462       | 447       | 414       |
| nonsense            | 70        | 57        | 81        | 84        | 73        | 81        | 72        |
| readthrough         | 12        | 11        | 8         | 12        | 11        | 8         | 11        |
| synonymous          | 11,130    | 10,005    | 11,679    | 11,587    | 11,654    | 11,672    | 11,658    |
| missense            | 10,089    | 8,955     | 10,737    | 10,564    | 10,652    | 10,702    | 10,756    |
| exonic;splicing     | 299       | 271       | 290       | 298       | 288       | 293       | 277       |
| intergenic          | 2,400,147 | 2,312,941 | 2,437,405 | 2,442,237 | 2,459,668 | 2,431,886 | 2,487,889 |
| intronic            | 1,292,182 | 1,231,568 | 1,311,612 | 1,310,792 | 1,323,570 | 1,310,525 | 1,351,868 |
| ncRNA_exonic        | 8,152     | 7,172     | 8,421     | 8,337     | 8,652     | 8,423     | 8,532     |
| ncRNA_intronic      | 99,280    | 93,026    | 99,491    | 99,426    | 99,663    | 99,250    | 103,437   |
| ncRNA_splicing      | 43        | 43        | 45        | 43        | 45        | 41        | 47        |
| ncRNA_UTR3          | 425       | 383       | 420       | 406       | 404       | 420       | 462       |
| ncRNA_UTR5          | 73        | 48        | 78        | 71        | 62        | 74        | 65        |
| splicing            | 103       | 93        | 111       | 116       | 111       | 107       | 116       |
| upstream            | 20,021    | 17,877    | 22,780    | 22,504    | 22,564    | 22,641    | 22,553    |
| upstream;downstream | 609       | 574       | 748       | 698       | 683       | 744       | 687       |
| UTR3                | 24,430    | 23,246    | 24,496    | 24,618    | 24,714    | 24,513    | 25,006    |
| UTR5                | 4,088     | 3,180     | 4,999     | 4,987     | 4,973     | 5,026     | 4,852     |
| UTR5;UTR3           | 10        | 9         | 9         | 10        | 8         | 9         | 11        |
| All                 | 3,893,563 | 3,730,577 | 3,956,593 | 3,959,912 | 3,990,870 | 3,949,608 | 4,052,401 |



**Supplementary Table S4. Statistics for all InDels identified in each sample**

| <b>Sample</b>       | <b>SF-002G</b> | <b>SF-001M</b> | <b>SF-003C</b> | <b>SF-002P</b> | <b>SF-003S</b> | <b>SF-003J</b> | <b>SF-002S</b> |
|---------------------|----------------|----------------|----------------|----------------|----------------|----------------|----------------|
| downstream          | 3,904          | 3,190          | 4,375          | 4,293          | 4,239          | 4,361          | 4,715          |
| exonic;splicing     | 14             | 8              | 15             | 18             | 15             | 16             | 14             |
| intergenic          | 348,189        | 298,575        | 375,027        | 372,950        | 366,770        | 370,371        | 400,442        |
| intronic            | 207,673        | 173,238        | 225,513        | 223,547        | 220,243        | 223,915        | 243,393        |
| ncRNA_exonic        | 878            | 692            | 932            | 907            | 934            | 915            | 977            |
| ncRNA_intronic      | 14,951         | 12,298         | 15,988         | 15,923         | 15,324         | 15,740         | 17,413         |
| ncRNA_splicing      | 6              | 5              | 10             | 11             | 7              | 8              | 3              |
| ncRNA_UTR3          | 63             | 58             | 84             | 79             | 79             | 87             | 86             |
| ncRNA_UTR5          | 5              | 3              | 8              | 8              | 9              | 7              | 9              |
| splicing            | 73             | 55             | 72             | 71             | 74             | 74             | 74             |
| upstream            | 2,887          | 2,218          | 3,850          | 3,788          | 3,705          | 3,886          | 3,906          |
| upstream;downstream | 97             | 77             | 117            | 119            | 102            | 117            | 115            |
| UTR3                | 4,814          | 4,196          | 5,128          | 5,003          | 5,044          | 5,089          | 5,418          |
| UTR5                | 375            | 229            | 650            | 666            | 615            | 665            | 529            |
| UTR5;UTR3           | 2              | 3              | 2              | 3              | 2              | 3              | 1              |
| frameshift          | 112            | 87             | 150            | 139            | 134            | 149            | 148            |
| nonframeshift       | 199            | 137            | 275            | 302            | 273            | 277            | 259            |
| missense            | 6              | 4              | 10             | 10             | 7              | 9              | 4              |
| nonsense            | 3              | 3              | 5              | 3              | 6              | 5              | 6              |
| readthrough         | 0              | 0              | 0              | 0              | 1              | 0              | 1              |
| synonymous          | 1              | 1              | 1              | 1              | 1              | 1              | 4              |
| exonic              | 63             | 60             | 79             | 77             | 75             | 80             | 73             |
| All                 | 584,315        | 495,137        | 632,291        | 627,918        | 617,659        | 625,775        | 677,590        |

**Supplementary Table S5. Statistics for all CNVs identified in each sample**

| <b>Sample</b>       | <b>SF-002G</b> | <b>SF-001M</b> | <b>SF-003C</b> | <b>SF-002P</b> | <b>SF-003S</b> | <b>SF-003J</b> | <b>SF-002S</b> |
|---------------------|----------------|----------------|----------------|----------------|----------------|----------------|----------------|
| downstream          | 3              | 2              | 5              | 6              | 6              | 8              | 4              |
| exonic              | 90             | 84             | 152            | 162            | 131            | 164            | 137            |
| intergenic          | 438            | 460            | 784            | 761            | 715            | 752            | 729            |
| intronic            | 92             | 87             | 207            | 206            | 201            | 226            | 226            |
| ncRNA_exonic        | 47             | 47             | 60             | 69             | 57             | 61             | 58             |
| ncRNA_intronic      | 3              | 6              | 23             | 24             | 22             | 26             | 18             |
| splicing            | 6              | 1              | 13             | 15             | 11             | 16             | 9              |
| upstream            | 1              | 2              | 8              | 8              | 10             | 11             | 9              |
| upstream;downstream | 1              | 0              | 0              | 0              | 0              | 0              | 0              |
| UTR3                | 0              | 0              | 0              | 1              | 0              | 0              | 5              |
| UTR5                | 0              | 0              | 0              | 0              | 0              | 0              | 1              |
| All                 | 681            | 689            | 1,252          | 1,252          | 1,153          | 1,264          | 1,196          |

**Supplementary Table S6. Statistics for all SVs identified in each sample**

| Sample         | SF-002G | SF-001M | SF-003C | SF-002P | SF-003S | SF-003J | SF-002S |
|----------------|---------|---------|---------|---------|---------|---------|---------|
| UTR3           | 2       | 0       | 2       | 0       | 0       | 11      | 1       |
| UTR5           | 0       | 0       | 2       | 0       | 0       | 6       | 2       |
| downstream     | 0       | 0       | 3       | 1       | 2       | 18      | 2       |
| exonic         | 129     | 66      | 438     | 153     | 174     | 945     | 327     |
| intergenic     | 324     | 299     | 1,083   | 403     | 556     | 2,833   | 831     |
| intronic       | 26      | 23      | 233     | 91      | 122     | 652     | 171     |
| ncRNA_exonic   | 33      | 11      | 106     | 29      | 35      | 398     | 57      |
| ncRNA_intronic | 1       | 0       | 9       | 2       | 3       | 17      | 7       |
| splicing       | 0       | 0       | 3       | 0       | 0       | 9       | 4       |
| upstream       | 0       | 0       | 6       | 2       | 1       | 17      | 5       |
| Total          | 515     | 399     | 1,885   | 681     | 893     | 4,906   | 1,407   |

**Supplementary Table S7. The filtration algorithm for identification of hereditary SNVs and Indels**

| <b>Filtration algorithm</b>                    | <b>SF-001G</b> | <b>SF-002M</b> | <b>SF-003C</b> | <b>SF-002P</b> | <b>SF-003S</b> | <b>SF-003J</b> | <b>SF-002S</b> |
|------------------------------------------------|----------------|----------------|----------------|----------------|----------------|----------------|----------------|
| Exclude SNVs with low quality                  | 3,348,181      | 3,172,066      | 3,340,598      | 3,343,787      | 3,376,830      | 3,340,376      | 3,374,025      |
| Exclude SNVs in HapMap (VAF>0.5%)              | 1,900,956      | 1,787,710      | 1,866,082      | 1,871,055      | 1,901,158      | 1,865,324      | 1,893,571      |
| Exclude common SNVs in 1000 Genomes (VAF>0.5%) | 309,771        | 290,785        | 268,190        | 274,344        | 295,094        | 267,768        | 292,363        |
| Exclude SNVs in dbSNP                          | 156,721        | 148,507        | 139,768        | 146,020        | 147,996        | 139,529        | 144,653        |
| Non-synonymous                                 | 282            | 258            | 230            | 262            | 236            | 230            | 203            |
| Disease inheritance mode analysis              | 59             | 59             | 37             | 59             | 23             | 37             | 0              |
| Function prediction                            | 20             | 20             | 11             | 20             | 8              | 11             | 0              |
| Haplotype analysis                             | 10             | 10             | 6              | 10             | 3              | 6              | 0              |

**Supplementary Table S8. Clinical information of the sporadic OSCCs**

| Tumor sample | Normal control | Age | Sex | Pathological diagnosis                                        | Life style (Tobacco / alcohol user) | HPV status | Biopsy done | cancer family history |
|--------------|----------------|-----|-----|---------------------------------------------------------------|-------------------------------------|------------|-------------|-----------------------|
| S1           | N1             | 48  | M   | Grade I & II tongue squamous cell carcinoma                   | Y/Y                                 | -          | Y           | N                     |
| S2           | N2             | 62  | M   | Tongue squamous cell chronic inflammation, anabrosis          | N/N                                 | -          | N           | N                     |
| S3           | N3             | -   | M   | -                                                             | -                                   | -          | -           | -                     |
| S4           | N4             | 55  | F   | Grade I tongue squamous cell carcinoma                        | N/N                                 | -          | Y           | N                     |
| S7           | N7             | 76  | F   | Tongue squamous cell carcinoma                                | N/N                                 | -          | Y           | N                     |
| S8           | -              | 72  | M   | Grade II tongue squamous cell carcinoma                       | Y/Y                                 | -          | Y           | N                     |
| S10          | N10            | 51  | M   | Grade I tongue squamous cell carcinoma, lymphatic metastasis  | Y/Y                                 | -          | Y           | N                     |
| S12          | N12            | 54  | F   | Grade II tongue squamous cell carcinoma                       | N/N                                 | -          | Y           | N                     |
| S13          | N13            | 48  | M   | Tongue squamous cell carcinoma                                | N/N                                 | -          | Y           | N                     |
| S14          | N14            | 57  | M   | Grade II tongue squamous cell carcinoma                       | N/Y                                 | -          | Y           | N                     |
| S15          | -              | 56  | M   | Grade I tongue squamous cell carcinoma                        | Y/Y                                 | -          | N           | N                     |
| S16          | N16            | 61  | M   | Grade I tongue squamous cell carcinoma                        | N/N                                 | -          | N           | N                     |
| S17          | N17            | 38  | F   | Grade I tongue squamous cell carcinoma                        | N/N                                 | -          | N           | N                     |
| S19          | N19            | 67  | M   | Grade II tongue squamous cell carcinoma                       | N/N                                 | -          | N           | N                     |
| S20          | N20            | 60  | M   | Grade I tongue squamous cell carcinoma                        | N/N                                 | -          | Y           | N                     |
| S21          | N21            | 47  | M   | Grade I tongue squamous cell carcinoma                        | Y/Y                                 | -          | N           | N                     |
| S22          | N22            | 51  | M   | Grade II tongue squamous cell carcinoma, lymphatic metastasis | Y/Y                                 | -          | Y           | N                     |
| S23          | N23            | -   | F   | -                                                             | -                                   | -          | -           | -                     |
| S24          | N24            | 53  | M   | Grade II tongue squamous cell carcinoma                       | N/N                                 | -          | N           | N                     |
| S25          | -              | 63  | M   | Tongue squamous cell carcinoma                                | Y/Y                                 | -          | Y           | N                     |
| S26          | -              | 74  | F   | Hard palate squamous cell carcinoma                           | N/N                                 | -          | Y           | N                     |
| S27          | N27            | 61  | M   | Grade I tongue squamous cell carcinoma, lymphatic metastasis  | Y/Y                                 | -          | Y           | N                     |
| S28          | -              | 53  | M   | Grade I tongue squamous cell carcinoma                        | Y/Y                                 | -          | Y           | N                     |
| S29          | N29            | 57  | M   | Tongue squamous cell carcinoma                                | N/N                                 | -          | Y           | N                     |
| S30          | -              | -   | -   | Tongue squamous cell carcinoma                                | N/N                                 | -          | -           | -                     |
| S31          | -              | -   | -   | Tongue squamous cell carcinoma                                | N/N                                 | -          | -           | -                     |

**Supplementary Table S9. Summary of SVs in familial OSCCs**

| <b>Gene involved</b>          | <b>SV type</b> | <b>Chr</b> | <b>Start</b> | <b>End</b> | <b>Annotation</b>      |
|-------------------------------|----------------|------------|--------------|------------|------------------------|
| Almost the entire chromosome  | DEL            | chr1       | 725430       | 224199634  | not confident          |
| CDC123, RP11-186N15.3, CAMK1D | DEL            | chr10      | 12273782     | 12434907   | gene region truncation |

**Supplementary Table S10. Summary of CNVs in familial OSCCs**

| <b>Genome element</b> | <b>Proximal gene</b> | <b>CNV type</b> | <b>Chr</b> | <b>Start</b> | <b>End</b> |
|-----------------------|----------------------|-----------------|------------|--------------|------------|
| intergenic            | AC142119.1;SNORA40   | deletion        | chr2       | 16270801     | 16274400   |
| intron                | AC007392.3           | deletion        | chr2       | 66855601     | 66870900   |
| intergenic            | RP11-317G22.2;CWH43  | deletion        | chr4       | 48943801     | 48953400   |
| intergenic            | U6;end               | deletion        | chr16      | 90294701     | 90354800   |
| intergenic            | ADAMTS10;ACTL9       | deletion        | chr19      | 8687201      | 8737200    |
| intergenic            | SNORA70;IGHV1OR21-1  | deletion        | chr21      | 10647801     | 10697900   |
| intergenic            | LIMK1;EIF4H          | deletion        | chr7       | 73549701     | 73551000   |
| intergenic            | DDX11L16;end         | deletion        | chrX       | 1.55E+08     | 1.55E+08   |
